# Supplementary material for: Direct interaction of metastasis-inducing S100P protein with tubulin causes enhanced cell migration without changes in cell adhesion
Source: PubMed Central journal article supplement (PMC7108782; doi:10.1042/bcj20190644), 2020-03-27
Supplement: BCJ-477-1159-s1.pdf [file BCJ-477-1159-s1.pdf]

## Supplementary Tables

**Supplementary Table S1: Primers used for recombinant protein production**

| Peptides                                 | 5' primer                                 | 3' primer                                |
|------------------------------------------|-------------------------------------------|------------------------------------------|
| $\alpha$ tubulin                         | CGTATCCACTCATATGCGTGAGTG<br>CATCTCCATCC   | CTACTGGATCCTTAGTATTCCTCTC<br>CTTCTTCCTC  |
| $\alpha$ tubulin N-terminus( $\alpha$ N) | CGTATCCACTCATATGCGTGAGTG<br>CATCTCCATCC   | CTACTGGATCCTTAATATGTGGCCA<br>GAGGGAAGTG  |
| $\alpha$ tubulin C-terminus( $\alpha$ C) | CGTATCCACTCATATGCCTGCATC<br>TCTGCTGAGAAAG | CTACTGGATCCTTAGTATTCCTCTC<br>CTTCTTCCTC  |
| $\beta$ tubulin N-terminus( $\beta$ N)   | GATGCGTAGCATATGCGTGAAATT<br>GTCCATATTCAG  | TAGATGGATCCTTAGATGTCATAG<br>AGGGCCTCATTG |
| $\beta$ tubulin C-terminus( $\beta$ C)   | GATGCGTAGCATATGTTCCGTACC<br>CTGAAGCTGACG  | GATGCGTAGCATATGCGTGAAATT<br>GTCCATATTCAG |

**Supplementary Table S2: Summary of SPR binding of S100P to  $\alpha\beta$ -tubulin**

| Buffer (procedure)                                    | Equilibrium dissociation constant $K_d \times 10^7$ |                          |
|-------------------------------------------------------|-----------------------------------------------------|--------------------------|
|                                                       | Kinetic <sup>a</sup>                                | Equilibrium <sup>b</sup> |
| 150mM NaCl, 0.5mM CaCl <sub>2</sub> (single cycle)    | 1.2±0.12                                            | 2.2±1.6                  |
| 150mM NaCl, 0.5mM CaCl <sub>2</sub> (multiple cycles) | 2.1±0.9                                             | 3.1±0.3                  |
| 300M NaCl, 0.5mM CaCl <sub>2</sub> (multiple cycles)  | 8.9±0.9                                             | 11±1.6                   |
| 500M NaCl, 0.5mM CaCl <sub>2</sub> (multiple cycles)  | 83±7                                                | 61±3.5                   |
| 150M NaCl, EDTA 5mM (multiple cycles)                 | 1L <sup>c</sup>                                     | 1L <sup>c</sup>          |

<sup>a</sup> Mean equilibrium dissociation constant  $K_d$  calculated from the association and dissociation rate constants using SPR (Materials and Methods)  $\pm$  SE from 3 separate experiments.

<sup>b</sup> Mean  $K_d$  calculated from extent of binding at or near equilibrium  $\pm$ SE from 3 separate experiments.

<sup>c</sup> 1L incalculably large.

**Supplementary Table S3: Identity of tubulin-related peptides synthesised**

| Fragment <sup>a</sup> , Region of tubulin <sup>b</sup> | Peptide identifier <sup>c</sup> | Sequence synthesized                                                     | Size (AA) |
|--------------------------------------------------------|---------------------------------|--------------------------------------------------------------------------|-----------|
| $\alpha$ -N, 116-145                                   | 1                               | DLVLDIRIRKLADQCTGLQGFLVFH-SFGGGT                                         | 30        |
| $\alpha$ -C, 328-357 <sup>d</sup>                      | 2                               | VNAAIATIKTKRTIQFVDWCPTGFK-VGINY                                          | 30        |
| $\beta$ -N, 163-190 <sup>d</sup>                       | 3                               | IMNTFSVVPSPKVSDTVVEPYNATL-SVH                                            | 30        |
| $\beta$ -N, 209-234                                    | 4                               | DICFRTLKLTPTYGDLNHLVSATMS                                                | 26        |
| $\beta$ -C, 240-264                                    | 5                               | LRFPGQLNADLRKLAVNMVPPRLH                                                 | 25        |
| Non muscle myosin IIA peptide <sup>e</sup>             |                                 | ASTRLKQLKRQLEEAEEEAQRANAS-RKLQRELEDATETADAMNREVSSL-KNKLRRGDLFPVVPRRMARKG | 71        |
| Tag                                                    |                                 | RRRQRRKKRG                                                               | 10        |
| Tagged DLV                                             | 1                               | RRRQRRKKRGDLVLDIRIRKLADQCT-GLQGFLVFHSFGGGT                               | 40        |
| Tagged DIC                                             | 4                               | RRRQRRKKRGDICFRTLKLTPTYGD-LNHLVSATMS                                     | 36        |
| Tagged IMN                                             | 3                               | RRRQRRKKRGIMNTFSVVPSPKVSDTVVEPYNATLSVH                                   | 40        |

<sup>a</sup> Half molecule fragments containing N or C terminal of  $\alpha$  or  $\beta$ -tubulin

<sup>b</sup> Region defined by amino acid residues in  $\alpha$  or  $\beta$ -tubulin

<sup>c</sup> Arbitrary peptide identifying number (Supplementary Figs S11, S12)

<sup>d</sup> Substitute one AA in peptide from original sequence

<sup>e</sup> Defined in ref 10

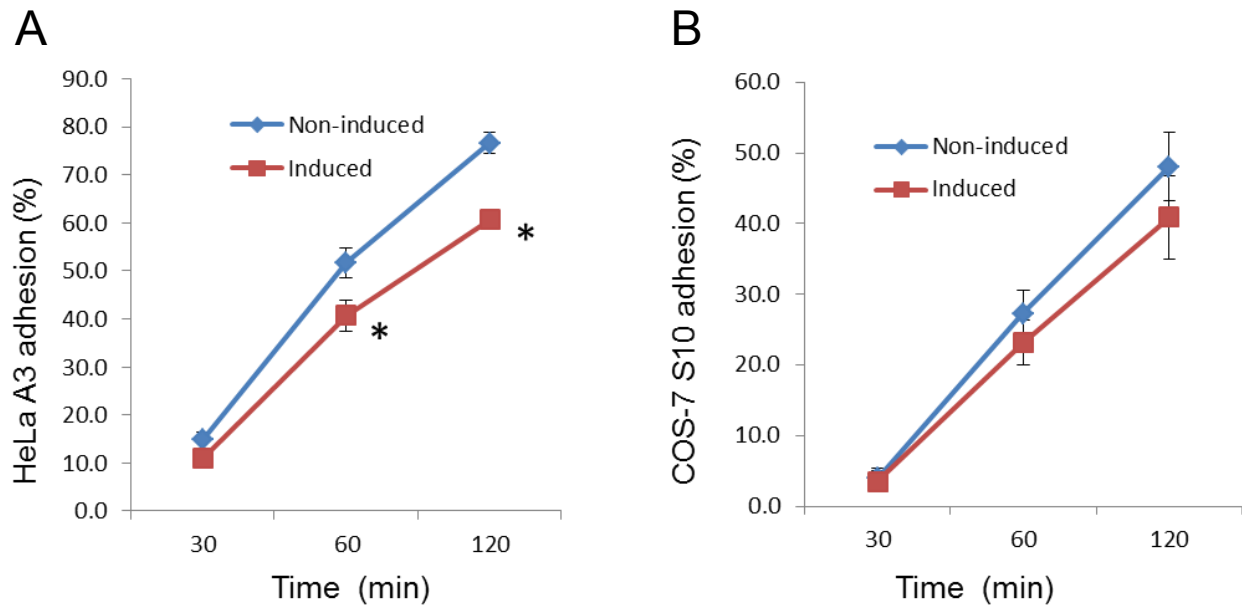

### Supplementary Figure S1. Rate of adhesion assay

Percent cells remaining that have adhered to tissue culture wells at different times after initial seeding are shown (Materials and Methods). **(A)** Control uninduced HeLa A3 cells and doxycycline-induced HeLa A3 cells. Differences at 30 min Student's  $t = 3.6$ ,  $P = 0.022$ ; 1 hour  $t = 4.3$ ,  $P = 0.013$ ; 2 hour  $t = 9.3$ ,  $P = 0.0007$ ,  $n = 3$ . **(B)** Control uninduced COS-7 S10 cells and doxycycline-induced COS-7 S10 cells. Differences at 30 min  $t = 0.4$ ,  $P = 0.69$ ; 1 hour  $t = 1.6$ ,  $P = 0.19$ ; 2 hour  $t = 1.6$ ,  $P = 0.18$ ,  $n = 3$ . Means  $\pm$  SD of each experiment ( $n=3$ ) are shown. Asterisk (\*) indicates significantly different between uninduced control and S100P-induced cells (Student's  $t$ -test,  $P < 0.05$ ).

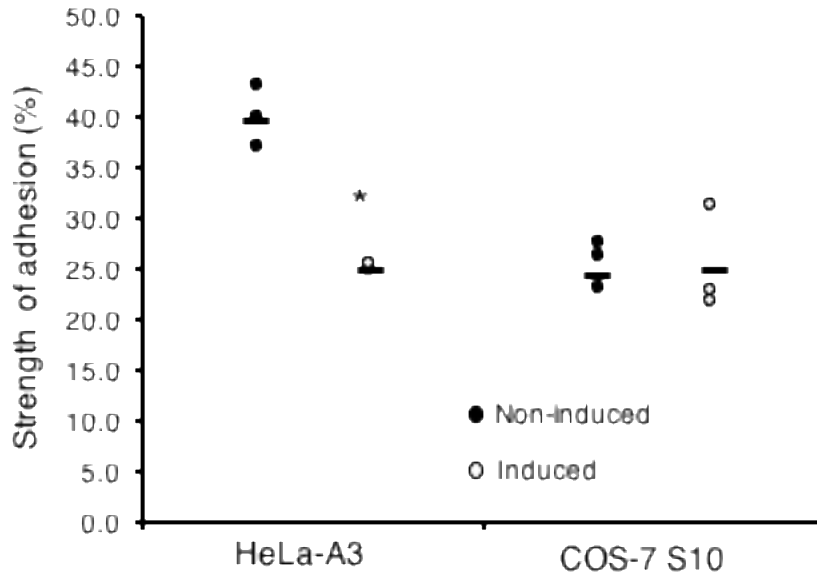

**Supplementary Figure S2. Strength of adhesion assay**

Cells (80% confluent) were predigested with dilute 0.0125% (w/v) trypsin in versene for 5 min to remove weakly bound cells. The remaining bound cells were removed and counted using standard procedures. Values are expressed as a percentage of the original number of cells seeded. When control uninduced HeLa A3 cells and doxycycline-induced HeLa A3 cells were compared, there was a significant 1.58 fold decrease in the strength of adhesion upon induction of S100P (Student's  $t = 6.7$ ,  $P = 0.022$ ,  $n = 3$ ). When uninduced COS-7 S10 cells and doxycyclin-induced COS-7 S10 cells were compared there was no significant change in the strength of adhesion upon induction of S100P ( $t = 0.6$ ,  $P = 0.95$ ,  $n = 3$ ). Asterisk (\*) indicates significantly different between uninduced control and S100P-induced cells (Student's  $t$ -test  $P < 0.05$ ).

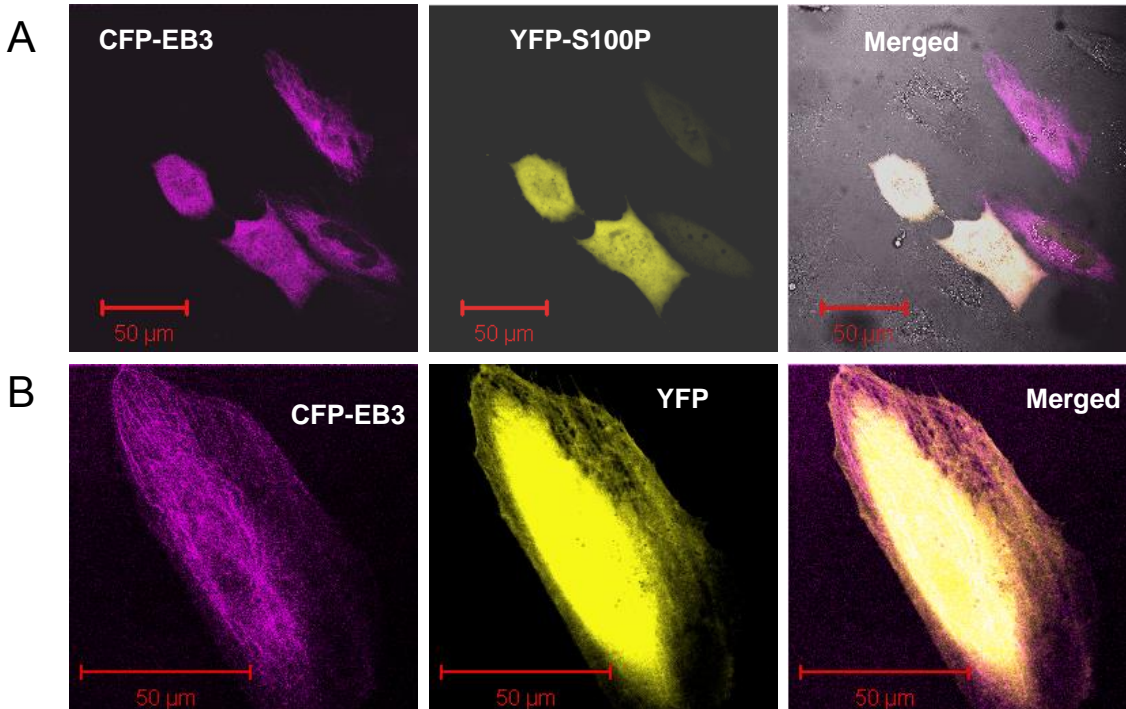

**Supplementary Figure S3. Effect of S100P on the distribution of MTs in COS-7 cells. Upper panels (A):** COS-7 cells were transiently co-transfected with expression vectors for Cyan Fluorescent Protein coupled to End Binding Protein 3 (CFP-EB3) and for Yellow Fluorescent Protein coupled to S100P (YFP-S100P) and photographed after 24h. **Lower panels (B):** COS-7 cells were transiently co-transfected with expression vectors for CFP-EB3 (Cyan) and for YFP alone (Yellow) as a control and photographed for the same time. Typical images are presented. Bars=50μm.

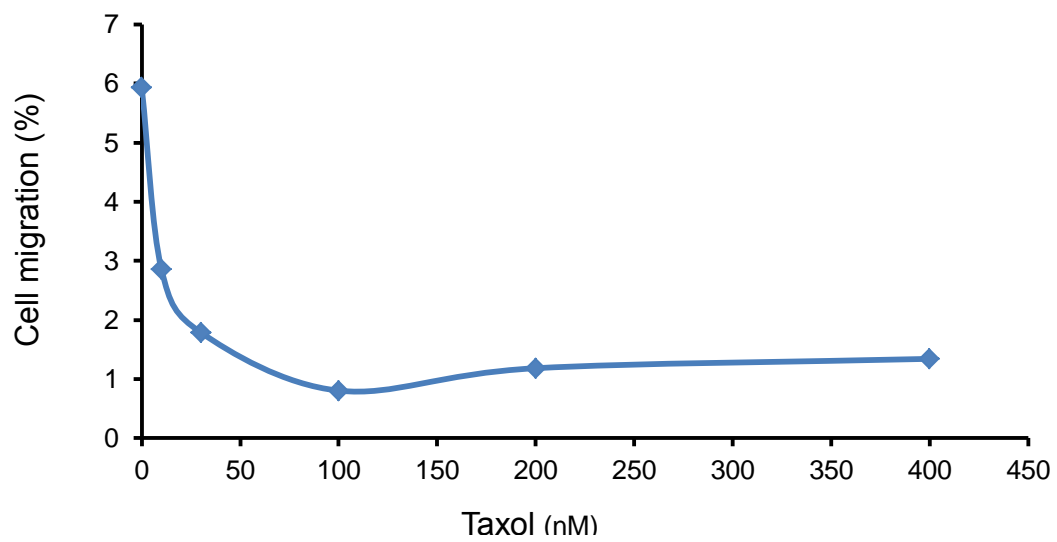

**Supplementary Figure S4. Effect of different concentrations of taxol on cell migration of COS-7 cells.**

The percentage of input cells which migrated after 24h is shown for different concentrations of taxol in nM.

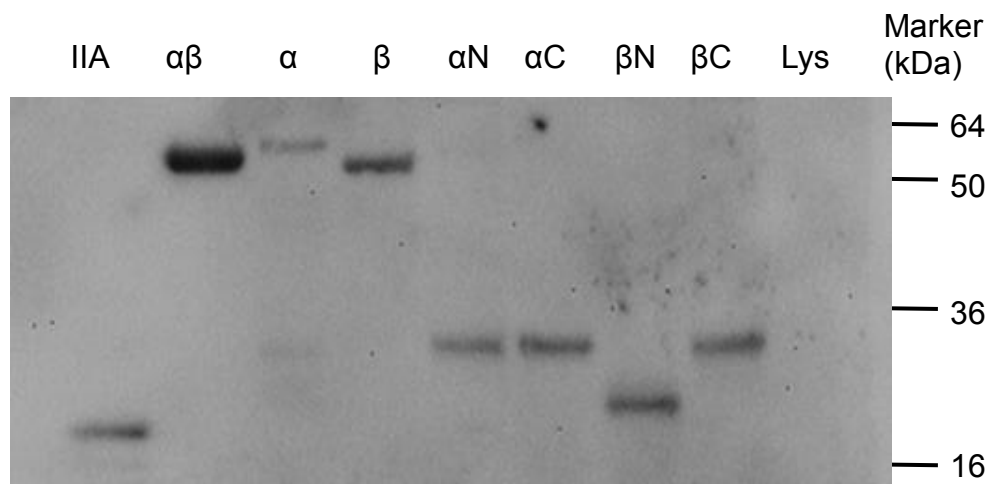

### Supplementary Figure S5. Gel overlay assay

Equal molar concentrations of control lysozyme (Lys) as negative control, nonmuscle myosin peptide (IIA, as positive control; Supplementary Table S3; ref 10),  $\alpha\beta$ -tubulin dimer ( $\alpha\beta$ ), His- $\alpha$ -tubulin ( $\alpha$ ),  $\beta$ -tubulin ( $\beta$ ),  $\alpha$ -tubulin N/C-terminus half molecules ( $\alpha N$ ,  $\alpha C$ );  $\beta$ -tubulin N/C terminus half molecules ( $\beta N$ ,  $\beta C$ ) were subjected to SDS-PAGE on 10% (w/v) polyacrylamide gels, transferred onto PVDF membrane and incubated with 3  $\mu\text{g/ml}$  S100P protein. The bound S100P was probed with anti-S100P serum and visualized with ECL (Methods).



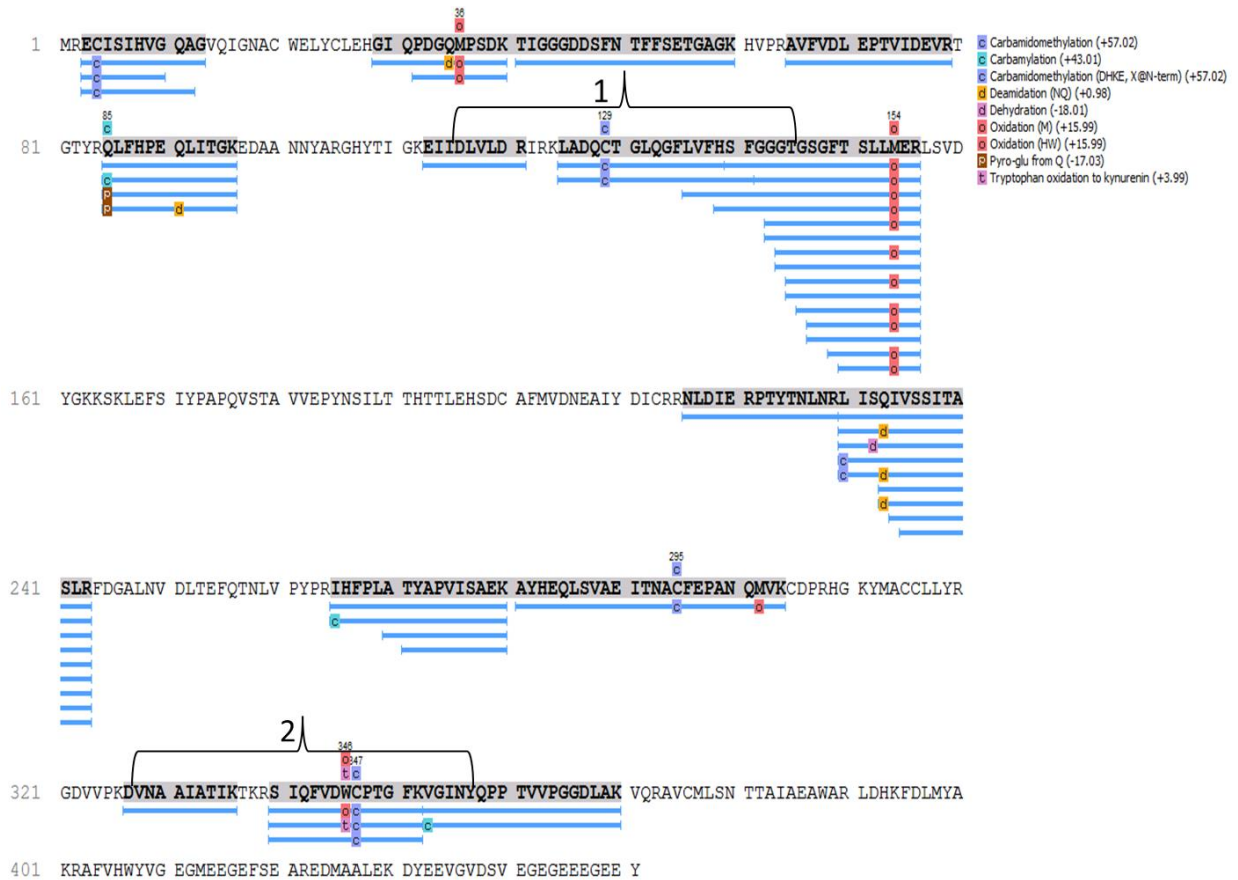

### Supplementary Figure S6. Identification of $\alpha$ -tubulin peptides that bind to S100P

Tryptic digests of  $\alpha$ -tubulin were applied to a S100P-conjugated Sepharose 4B column. After extensive washings, any bound peptides were eluted with 0.1M Glycine pH 2.5 and analyzed in a mass spectrometer (Dundee University Mass Spectrometry Service). The different peptides in blue were aligned qualitatively on the known human  $\alpha$ -tubulin sequence using PEAK 7 software. Modifications introduced prior to or during the mass spectrometric analysis are also shown. The peptides labelled 1 and 2, selected for synthesis in Supplementary Table S3, are also shown superimposed on the amino acid sequence for  $\alpha$ -tubulin.

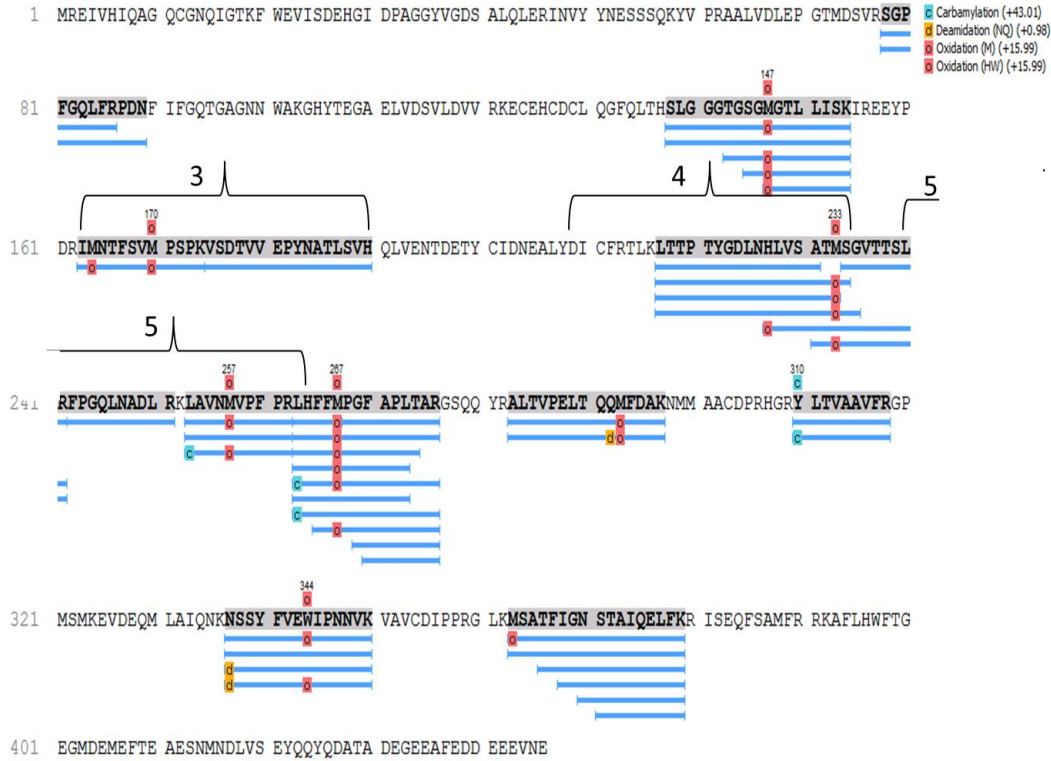

### Supplementary Figure S7. Identification of $\beta$ -tubulin peptides that bind to S100P

Similar to Figure S6, the alignments of the mass spectrometry-identified sequences of isolated  $\beta$ -tubulin tryptic peptides are shown in blue. These sequences were obtained from mass spectrometric analysis of tryptic digests of  $\beta$ -tubulin bound to S100P-conjugated Sepharose 4B beads using PEAK 7 software. The peptides labelled 3-5 selected for synthesis in Supplementary Table S3 are shown superimposed on the amino acid sequence for  $\beta$ -tubulin.
